# Supplementary material for: Trajectory calculations of OH radical- and Cl atom-initiated reaction of glyoxal: atmospheric chemistry of the HC(O)CO radical
Source: Royal Society of Chemistry journal article supplement (doi:10.1039/c0cp01942a), 2011-01-01
Supplement: c0cp01942a.pdf [file c0cp01942a.pdf]

## On-the-fly dynamics of OH radical- and Cl atom-initiated reaction of glyoxal: Atmospheric chemistry of the HC(O)CO radical

Supplementary Material

Osamu Setokuchi

o.setokuchi@aist.go.jp

Optimized geometries<sup>a</sup> of the isolated A'' HC(O)CO, A' HC(O)CO and C-C fission TS

|                                                                         | MPWB1K/6-31+G(d,p) |       |       | B3LYP/6-311G(d,p) |       |       | BH&HLYP/cc-pvDZ |       |       |
|-------------------------------------------------------------------------|--------------------|-------|-------|-------------------|-------|-------|-----------------|-------|-------|
|                                                                         | A''                | A'    | TS    | A''               | A'    | TS    | A''             | A'    | TS    |
| <b>R</b> (O <sub>1</sub> C <sub>2</sub> )                               | 1.149              | 1.171 | 1.138 | 1.155             | 1.176 | 1.143 | 1.147           | 1.168 | 1.138 |
| <b>R</b> (C <sub>2</sub> C <sub>3</sub> )                               | 1.382              | 1.553 | 2.034 | 1.391             | 1.592 | 2.023 | 1.384           | 1.557 | 1.966 |
| <b>R</b> (C <sub>3</sub> O <sub>4</sub> )                               | 1.244              | 1.186 | 1.172 | 1.251             | 1.188 | 1.177 | 1.243           | 1.183 | 1.169 |
| <b>R</b> (C <sub>3</sub> H <sub>5</sub> )                               | 1.090              | 1.102 | 1.104 | 1.098             | 1.112 | 1.112 | 1.098           | 1.109 | 1.112 |
| <b>θ</b> (O <sub>1</sub> C <sub>2</sub> C <sub>3</sub> )                | 179.3              | 122.1 | 122.7 | 177.1             | 121.0 | 124.6 | 179.7           | 122.5 | 124.0 |
| <b>θ</b> (C <sub>2</sub> C <sub>3</sub> O <sub>4</sub> )                | 120.5              | 122.5 | 118.6 | 119.8             | 123.3 | 119.1 | 121.4           | 122.8 | 120.0 |
| <b>θ</b> (C <sub>2</sub> C <sub>3</sub> H <sub>5</sub> )                | 114.7              | 113.6 | 107.0 | 114.9             | 112.1 | 105.9 | 113.5           | 112.8 | 107.0 |
| <b>τ</b> (O <sub>4</sub> C <sub>3</sub> C <sub>2</sub> O <sub>1</sub> ) | 0.0                | 180.0 | 79.4  | 0.0               | 180.0 | 82.0  | 180.0           | 180.0 | 86.3  |
| <b>τ</b> (H <sub>5</sub> C <sub>3</sub> C <sub>2</sub> O <sub>4</sub> ) | 180.0              | 180.0 | 152.0 | 180.0             | 180.0 | 151.0 | 180.0           | 180.0 | 155.1 |

<sup>a</sup> Bond Length R in angstrom, and bond angles  $\theta$  and dihedral angles  $\tau$  in degrees.
